# Supplementary material for: Dichloromethane replacement: towards greener chromatography via Kirkwood–Buff integrals
Source: Royal Society of Chemistry journal article supplement (doi:10.1039/d2ay01266a), 2023-01-01
Supplement: d2ay01266a1.pdf [file d2ay01266a1.pdf]

## Electronic Supplementary Information

### Dichloromethane replacement: towards greener chromatography via statistical thermodynamics

Julie Lynch, James Sherwood, C. Rob McElroy, Jane Murray, and Seishi Shimizu

#### S1. Materials and Methods

##### S1.1 Materials

DCM (99%), MeOH (99.9%), EtOAc (98%), and EtOH (99.8%), were obtained from Fisher Scientific (Loughborough, England). Heptane (99%), ethyl isobutyrate (99%), and methyl pivalate (99.9%) were obtained from Sigma-Aldrich (Merck). *tert*-Butyl acetate (99%), and *sec*-butyl acetate were obtained from Fluorochem (UK) and Thermo Scientific, respectively. Analytes ibuprofen (99.1%), ketoprofen (99.51%), and acetaminophen (99.96%) were obtained from APExBIO (USA), caffeine (99%) and 4-aminophenol (99%) were obtained Sigma-Aldrich (Merck), and *o*-acetylsalicylic acid (99%) was obtained from Alfa Aesar and used without any further purification. For Kamlet-Taft tests, dyes *N,N*-diethyl-4-nitroaniline (97%) and 4-nitroaniline (99%) were obtained from Fluorochem (UK) and Sigma-Aldrich, respectively. TLC plates (TLC Silica gel 60 F254, aluminium support, 20 cm x 20 cm, Merck) were cut to 2.0 cm x 8.0 cm plates and analysed via a 254 nm UV lamp (UVP UVGL-55 Handheld UV Lamp, 254/365 nm, multi-band split tube) and viewing cabinet.

##### S1.2 Calculation of Kamlet-Taft Parameters

The  $\pi^*$  and  $\beta$  Kamlet-Taft parameters for test solvents (S) *tert*-butyl acetate and *sec*-butyl acetate were determined in this work; the  $\alpha$  parameter was not calculated as this was assumed to be zero. Dyes *N,N*-diethyl-4-nitroaniline (*D-NA*) and 4-nitroaniline (NA) were dissolved in the both solvents and mixtures were subsequently scanned on a Jasco 550 UV-Vis spectrometer to determine the  $\nu_{max}(N,N)$  and  $\nu_{max}(NA)$ . The  $\pi^*$  parameter was determined using equation S1<sup>1,2</sup> and the  $\beta$  parameter was determined using equations S2 and S3 from the original literature.<sup>3</sup> Experimental wavelength values were converted to kilokaiser (kK) before use in calculations.

$$\pi^* = \frac{\nu_{\max(N,N)}[S] - \nu_{\max(N,N)}[\text{cyclohexane}]}{\nu_{\max(N,N)}[\text{DMSO}] - \nu_{\max(N,N)}[\text{cyclohexane}]} \quad (\text{Eq. S1})$$

$$\nu_{\max(NA)}[S_{\text{calculated}}] = 1.035(\nu_{\max(D-NA)}[S_{\text{observed}}]) + 2.64 \text{ kK} \quad (\text{Eq. S2})$$

$$\beta = \frac{\nu_{\max(NA)}[S_{\text{calculated}}] - \nu_{\max(NA)}[S_{\text{observed}}]}{2.8} \quad (\text{Eq. S3})$$

### S1.3 Calculation of the Solvent Strength Parameter ( $\mathcal{E}^o$ )

The solvent strength parameter ( $\mathcal{E}^o$ ) can be estimated through eq. S4 for silica<sup>4</sup>:

$$\mathcal{E}^o = -0.264V + 0.199S + 0.384A + 0.535B + 0.272 \quad (\text{Eq. S4})$$

where, for a given solvent,  $V$  is the McGowan's characteristic volume<sup>5</sup>,  $S$  is dipolarity/polarisability,  $A$  is effective hydrogen-bond acidity, and  $B$  is effective hydrogen bond basicity. Through a ranking system of increasing polarity, wherein  $\mathcal{E}^o$  (pentane) is arbitrarily set to zero, one can select a potential alternative based on similar solvent strength values.

## S2. Experimental Data and Analysis

### S2.1 Thin Layer Chromatography (TLC) - Test Solvents Modified with MeOH

**Table 1.**  $R_f$  values (n=3) for acetylsalicylic acid (A), ketoprofen (B), caffeine (C), and acetaminophen (D) run in DCM modified with 0-20% MeOH.

| Analyte A (DCM-MeOH) |           |           |           |                 |           |
|----------------------|-----------|-----------|-----------|-----------------|-----------|
| % MeOH               | $R_f$ (1) | $R_f$ (2) | $R_f$ (3) | $R_f$ (average) | Std. dev. |
| 0                    | 0         | 0         | 0         | 0               | 0         |
| 2                    | 0.17      | 0.19      | 0.17      | 0.18            | 0.013     |
| 5                    | 0.43      | 0.40      | 0.40      | 0.41            | 0.016     |
| 10                   | 0.54      | 0.54      | 0.54      | 0.54            | 0         |
| 20                   | 0.80      | 0.77      | 0.80      | 0.79            | 0.016     |
| Analyte B (DCM-MeOH) |           |           |           |                 |           |
| % MeOH               | $R_f$ (1) | $R_f$ (2) | $R_f$ (3) | $R_f$ (average) | Std. dev. |
| 0                    | 0         | 0         | 0         | 0               | 0         |
| 2                    | 0.17      | 0.20      | 0.17      | 0.18            | 0.016     |
| 5                    | 0.29      | 0.31      | 0.31      | 0.30            | 0.016     |
| 10                   | 0.54      | 0.51      | 0.54      | 0.53            | 0.016     |
| 20                   | 0.86      | 0.83      | 0.88      | 0.85            | 0.025     |
| Analyte C (DCM-MeOH) |           |           |           |                 |           |
| % MeOH               | $R_f$ (1) | $R_f$ (2) | $R_f$ (3) | $R_f$ (average) | Std. dev. |
| 0                    | 0         | 0         | 0         | 0               | 0         |
| 2                    | 0.057     | 0.057     | 0.057     | 0.057           | 0         |
| 5                    | 0.20      | 0.20      | 0.20      | 0.20            | 0         |
| 10                   | 0.51      | 0.51      | 0.51      | 0.51            | 0         |
| 20                   | 0.83      | 0.86      | 0.86      | 0.85            | 0.016     |
| Analyte D (DCM-MeOH) |           |           |           |                 |           |
| % MeOH               | $R_f$ (1) | $R_f$ (2) | $R_f$ (3) | $R_f$ (average) | Std. dev. |
| 0                    | 0.025     | 0.025     | 0.025     | 0.03            | 0         |
| 2                    | 0.048     | 0.071     | 0.071     | 0.06            | 0.014     |
| 5                    | 0.32      | 0.35      | 0.35      | 0.34            | 0.017     |
| 10                   | 0.62      | 0.59      | 0.62      | 0.61            | 0.017     |
| 20                   | 0.96      | 0.94      | 0.92      | 0.94            | 0.020     |

**Table 2.**  $R_f$  values (n=3) for acetylsalicylic acid (A), ketoprofen (B), caffeine (C), and acetaminophen (D) run in *tert*-butyl acetate (1) modified with 0-20% MeOH.

| Analyte A (1-MeOH) |           |           |           |                 |           |
|--------------------|-----------|-----------|-----------|-----------------|-----------|
| % MeOH             | $R_f$ (1) | $R_f$ (2) | $R_f$ (3) | $R_f$ (average) | Std. dev. |
| 0                  | 0.22      | 0.22      | 0.24      | 0.23            | 0.013     |
| 2                  | 0.37      | 0.34      | 0.34      | 0.35            | 0.016     |
| 5                  | 0.56      | 0.58      | 0.57      | 0.57            | 0.011     |
| 10                 | 0.65      | 0.68      | 0.68      | 0.67            | 0.017     |
| 20                 | 0.73      | 0.72      | 0.72      | 0.72            | 0.002     |
| Analyte B (1-MeOH) |           |           |           |                 |           |
| % MeOH             | $R_f$ (1) | $R_f$ (2) | $R_f$ (3) | $R_f$ (average) | Std. dev. |
| 0                  | 0.33      | 0.33      | 0.38      | 0.35            | 0.026     |
| 2                  | 0.41      | 0.38      | 0.40      | 0.40            | 0.014     |
| 5                  | 0.53      | 0.53      | 0.54      | 0.54            | 0.006     |
| 10                 | 0.68      | 0.68      | 0.71      | 0.69            | 0.019     |
| 20                 | 0.83      | 0.78      | 0.79      | 0.80            | 0.026     |
| Analyte C (1-MeOH) |           |           |           |                 |           |
| % MeOH             | $R_f$ (1) | $R_f$ (2) | $R_f$ (3) | $R_f$ (average) | Std. dev. |
| 0                  | 0.022     | 0.022     | 0         | 0.01            | 0.013     |
| 2                  | 0.061     | 0.060     | 0.060     | 0.06            | 0.001     |
| 5                  | 0.16      | 0.16      | 0.15      | 0.15            | 0.002     |
| 10                 | 0.33      | 0.35      | 0.34      | 0.34            | 0.013     |
| 20                 | 0.40      | 0.40      | 0.40      | 0.40            | 0         |
| Analyte D (1-MeOH) |           |           |           |                 |           |
| % MeOH             | $R_f$ (1) | $R_f$ (2) | $R_f$ (3) | $R_f$ (average) | Std. dev. |
| 0                  | 0.16      | 0.18      | 0.16      | 0.17            | 0.013     |
| 2                  | 0.29      | 0.28      | 0.26      | 0.28            | 0.014     |
| 5                  | 0.44      | 0.47      | 0.46      | 0.46            | 0.011     |
| 10                 | 0.65      | 0.68      | 0.66      | 0.66            | 0.013     |
| 20                 | 0.73      | 0.70      | 0.70      | 0.71            | 0.015     |

**Table 3.**  $R_f$  values (n=3) for acetylsalicylic acid (A), ketoprofen (B), caffeine (C), and acetaminophen (D) run in *sec*-butyl acetate (2) modified with 0-20% MeOH.

| Analyte A (2-MeOH) |           |           |           |                 |           |
|--------------------|-----------|-----------|-----------|-----------------|-----------|
| % MeOH             | $R_f$ (1) | $R_f$ (2) | $R_f$ (3) | $R_f$ (average) | Std. dev. |
| 0                  | 0.32      | 0.32      | 0.34      | 0.33            | 0.013     |
| 2                  | 0.42      | 0.40      | 0.40      | 0.41            | 0.013     |
| 5                  | 0.49      | 0.50      | 0.54      | 0.51            | 0.026     |
| 10                 | 0.54      | 0.58      | 0.59      | 0.57            | 0.027     |
| 20                 | 0.62      | 0.66      | 0.62      | 0.63            | 0.023     |
| Analyte B (2-MeOH) |           |           |           |                 |           |
| % MeOH             | $R_f$ (1) | $R_f$ (2) | $R_f$ (3) | $R_f$ (average) | Std. dev. |
| 0                  | 0.48      | 0.48      | 0.45      | 0.47            | 0.014     |
| 2                  | 0.56      | 0.56      | 0.54      | 0.55            | 0.011     |
| 5                  | 0.58      | 0.58      | 0.55      | 0.57            | 0.014     |
| 10                 | 0.61      | 0.61      | 0.61      | 0.61            | 0         |
| 20                 | 0.64      | 0.64      | 0.67      | 0.65            | 0.015     |
| Analyte C (2-MeOH) |           |           |           |                 |           |
| % MeOH             | $R_f$ (1) | $R_f$ (2) | $R_f$ (3) | $R_f$ (average) | Std. dev. |
| 0                  | 0.04      | 0.06      | 0.06      | 0.06            | 0.012     |
| 2                  | 0.04      | 0.04      | 0.04      | 0.04            | 0.002     |
| 5                  | 0.10      | 0.10      | 0.10      | 0.10            | 0.002     |
| 10                 | 0.27      | 0.27      | 0.28      | 0.27            | 0.003     |
| 20                 | 0.36      | 0.36      | 0.33      | 0.35            | 0.013     |
| Analyte D (2-MeOH) |           |           |           |                 |           |
| % MeOH             | $R_f$ (1) | $R_f$ (2) | $R_f$ (3) | $R_f$ (average) | Std. dev. |
| 0                  | 0.18      | 0.14      | 0.14      | 0.15            | 0.024     |
| 2                  | 0.30      | 0.30      | 0.40      | 0.33            | 0.056     |
| 5                  | 0.40      | 0.40      | 0.44      | 0.41            | 0.023     |
| 10                 | 0.5       | 0.52      | 0.53      | 0.52            | 0.016     |
| 20                 | 0.60      | 0.60      | 0.60      | 0.60            | 0         |

**Table 4.**  $R_f$  values (n=3) for acetylsalicylic acid (A), ketoprofen (B), caffeine (C), and acetaminophen (D) run in ethyl isobutyrate (3) modified with 0-20% MeOH.

| Analyte A (3-MeOH) |           |           |           |                 |           |
|--------------------|-----------|-----------|-----------|-----------------|-----------|
| % MeOH             | $R_f$ (1) | $R_f$ (2) | $R_f$ (3) | $R_f$ (average) | Std. dev. |
| 0                  | 0.17      | 0.17      | 0.20      | 0.18            | 0.013     |
| 2                  | 0.33      | 0.29      | 0.31      | 0.31            | 0.018     |
| 5                  | 0.48      | 0.48      | 0.46      | 0.47            | 0.013     |
| 10                 | 0.50      | 0.52      | 0.51      | 0.51            | 0.010     |
| 20                 | 0.66      | 0.63      | 0.65      | 0.65            | 0.013     |
| Analyte B (3-MeOH) |           |           |           |                 |           |
| % MeOH             | $R_f$ (1) | $R_f$ (2) | $R_f$ (3) | $R_f$ (average) | Std. dev. |
| 0                  | 0.33      | 0.33      | 0.33      | 0.33            | 0         |
| 2                  | 0.36      | 0.33      | 0.35      | 0.35            | 0.018     |
| 5                  | 0.50      | 0.50      | 0.48      | 0.49            | 0.013     |
| 10                 | 0.54      | 0.54      | 0.55      | 0.54            | 0.004     |
| 20                 | 0.68      | 0.65      | 0.65      | 0.66            | 0.017     |
| Analyte C (3-MeOH) |           |           |           |                 |           |
| % MeOH             | $R_f$ (1) | $R_f$ (2) | $R_f$ (3) | $R_f$ (average) | Std. dev. |
| 0                  | 0         | 0         | 0         | 0               | 0         |
| 2                  | 0.05      | 0.05      | 0.05      | 0.05            | 0         |
| 5                  | 0.13      | 0.13      | 0.13      | 0.13            | 0.003     |
| 10                 | 0.27      | 0.24      | 0.27      | 0.26            | 0.018     |
| 20                 | 0.38      | 0.37      | 0.39      | 0.38            | 0.013     |
| Analyte D (3-MeOH) |           |           |           |                 |           |
| % MeOH             | $R_f$ (1) | $R_f$ (2) | $R_f$ (3) | $R_f$ (average) | Std. dev. |
| 0                  | 0.16      | 0.14      | 0.14      | 0.15            | 0.012     |
| 2                  | 0.20      | 0.22      | 0.20      | 0.21            | 0.010     |
| 5                  | 0.38      | 0.35      | 0.37      | 0.37            | 0.011     |
| 10                 | 0.48      | 0.50      | 0.53      | 0.50            | 0.023     |
| 20                 | 0.60      | 0.60      | 0.61      | 0.60            | 0.006     |

**Table 5.**  $R_f$  values (n=3) for acetylsalicylic acid (A), ketoprofen (B), caffeine (C), and acetaminophen (D) run in methyl pivalate (4) modified with 0-20% MeOH.

| Analyte A (4-MeOH) |           |           |           |                 |           |
|--------------------|-----------|-----------|-----------|-----------------|-----------|
| % MeOH             | $R_f$ (1) | $R_f$ (2) | $R_f$ (3) | $R_f$ (average) | Std. dev. |
| 0                  | 0.20      | 0.17      | 0.17      | 0.18            | 0.014     |
| 2                  | 0.30      | 0.32      | 0.32      | 0.31            | 0.009     |
| 5                  | 0.46      | 0.44      | 0.44      | 0.45            | 0.011     |
| 10                 | 0.52      | 0.52      | 0.53      | 0.52            | 0.006     |
| 20                 | 0.69      | 0.63      | 0.67      | 0.66            | 0.032     |
| Analyte B (4-MeOH) |           |           |           |                 |           |
| % MeOH             | $R_f$ (1) | $R_f$ (2) | $R_f$ (3) | $R_f$ (average) | Std. dev. |
| 0                  | 0.24      | 0.27      | 0.24      | 0.25            | 0.014     |
| 2                  | 0.28      | 0.30      | 0.30      | 0.29            | 0.009     |
| 5                  | 0.48      | 0.48      | 0.48      | 0.48            | 0         |
| 10                 | 0.54      | 0.52      | 0.55      | 0.54            | 0.016     |
| 20                 | 0.73      | 0.73      | 0.71      | 0.73            | 0.013     |
| Analyte C (4-MeOH) |           |           |           |                 |           |
| % MeOH             | $R_f$ (1) | $R_f$ (2) | $R_f$ (3) | $R_f$ (average) | Std. dev. |
| 0                  | 0         | 0         | 0         | 0               | 0         |
| 2                  | 0.04      | 0.04      | 0.04      | 0.04            | 0.002     |
| 5                  | 0.10      | 0.10      | 0.10      | 0.10            | 0.002     |
| 10                 | 0.27      | 0.27      | 0.28      | 0.27            | 0.003     |
| 20                 | 0.36      | 0.36      | 0.33      | 0.35            | 0.013     |
| Analyte D (4-MeOH) |           |           |           |                 |           |
| % MeOH             | $R_f$ (1) | $R_f$ (2) | $R_f$ (3) | $R_f$ (average) | Std. dev. |
| 0                  | 0.11      | 0.11      | 0.13      | 0.12            | 0.013     |
| 2                  | 0.17      | 0.19      | 0.19      | 0.19            | 0.010     |
| 5                  | 0.33      | 0.30      | 0.30      | 0.31            | 0.019     |
| 10                 | 0.54      | 0.54      | 0.54      | 0.54            | 0         |
| 20                 | 0.64      | 0.64      | 0.64      | 0.64            | 0         |

## S2.2 Thin Layer Chromatography (TLC) – Test Solvents Modified with 3:1 EtOAc-EtOH

**Table 6.**  $R_f$  values (n=3) for acetylsalicylic acid (A), ketoprofen (B), caffeine (C), and acetaminophen (D) run in DCM modified with 0-75% 3:1 EtOAc-EtOH.

| Analyte A (DCM-3:1 EtOAc-EtOH) |           |           |           |                 |           |
|--------------------------------|-----------|-----------|-----------|-----------------|-----------|
| % 3:1 EtOAc-EtOH               | $R_f$ (1) | $R_f$ (2) | $R_f$ (3) | $R_f$ (average) | Std. dev. |
| 0                              | 0         | 0         | 0         | 0               | 0         |
| 10                             | 0.27      | 0.29      | 0.29      | 0.28            | 0.013     |
| 25                             | 0.62      | 0.62      | 0.60      | 0.61            | 0.012     |
| 50                             | 0.71      | 0.73      | 0.73      | 0.73            | 0.013     |
| 75                             | 0.79      | 0.77      | 0.79      | 0.78            | 0.013     |
| Analyte B (DCM-3:1 EtOAc-EtOH) |           |           |           |                 |           |
| % 3:1 EtOAc-EtOH               | $R_f$ (1) | $R_f$ (2) | $R_f$ (3) | $R_f$ (average) | Std. dev. |
| 0                              | 0         | 0         | 0         | 0               | 0         |
| 10                             | 0.38      | 0.38      | 0.36      | 0.37            | 0.013     |
| 25                             | 0.68      | 0.68      | 0.66      | 0.67            | 0.012     |
| 50                             | 0.80      | 0.80      | 0.79      | 0.80            | 0.007     |
| 75                             | 0.86      | 0.84      | 0.86      | 0.86            | 0.010     |
| Analyte C (DCM-3:1 EtOAc-EtOH) |           |           |           |                 |           |
| % 3:1 EtOAc-EtOH               | $R_f$ (1) | $R_f$ (2) | $R_f$ (3) | $R_f$ (average) | Std. dev. |
| 0                              | 0         | 0         | 0         | 0               | 0         |
| 10                             | 0.22      | 0.22      | 0.22      | 0.22            | 0         |
| 25                             | 0.45      | 0.45      | 0.45      | 0.45            | 0         |
| 50                             | 0.48      | 0.48      | 0.46      | 0.47            | 0.012     |
| 75                             | 0.55      | 0.53      | 0.53      | 0.54            | 0.007     |
| Analyte D (DCM-3:1 EtOAc-EtOH) |           |           |           |                 |           |
| % 3:1 EtOAc-EtOH               | $R_f$ (1) | $R_f$ (2) | $R_f$ (3) | $R_f$ (average) | Std. dev. |
| 0                              | 0.03      | 0.03      | 0.03      | 0.03            | 0         |
| 10                             | 0.17      | 0.17      | 0.13      | 0.16            | 0.025     |
| 25                             | 0.48      | 0.46      | 0.46      | 0.46            | 0.013     |
| 50                             | 0.71      | 0.71      | 0.73      | 0.72            | 0.013     |
| 75                             | 0.82      | 0.84      | 0.82      | 0.83            | 0.012     |



**Table 7.**  $R_f$  values (n=3) for acetylsalicylic acid (A), ketoprofen (B), caffeine (C), and acetaminophen (D) run in *tert*-butyl acetate (1) modified with 0-75% 3:1 EtOAc-EtOH.

| Analyte A (1-3:1 EtOAc-EtOH) |           |           |           |                 |           |
|------------------------------|-----------|-----------|-----------|-----------------|-----------|
| % 3:1 EtOAc-EtOH             | $R_f$ (1) | $R_f$ (2) | $R_f$ (3) | $R_f$ (average) | Std. dev. |
| 0                            | 0.22      | 0.22      | 0.24      | 0.23            | 0.013     |
| 10                           | 0.31      | 0.31      | 0.33      | 0.32            | 0.013     |
| 25                           | 0.47      | 0.45      | 0.45      | 0.45            | 0.012     |
| 50                           | 0.59      | 0.63      | 0.63      | 0.62            | 0.025     |
| 75                           | 0.78      | 0.80      | 0.80      | 0.79            | 0.012     |
| Analyte B (1-3:1 EtOAc-EtOH) |           |           |           |                 |           |
| % 3:1 EtOAc-EtOH             | $R_f$ (1) | $R_f$ (2) | $R_f$ (3) | $R_f$ (average) | Std. dev. |
| 0                            | 0.29      | 0.28      | 0.30      | 0.29            | 0.011     |
| 10                           | 0.48      | 0.50      | 0.52      | 0.50            | 0.023     |
| 25                           | 0.54      | 0.57      | 0.76      | 0.62            | 0.120     |
| 50                           | 0.72      | 0.72      | 0.74      | 0.73            | 0.012     |
| 75                           | 0.88      | 0.86      | 0.88      | 0.87            | 0.012     |
| Analyte C (1-3:1 EtOAc-EtOH) |           |           |           |                 |           |
| % 3:1 EtOAc-EtOH             | $R_f$ (1) | $R_f$ (2) | $R_f$ (3) | $R_f$ (average) | Std. dev. |
| 0                            | 0.02      | 0.02      | 0         | 0.01            | 0.013     |
| 10                           | 0.05      | 0.07      | 0.07      | 0.06            | 0.013     |
| 25                           | 0.11      | 0.09      | 0.09      | 0.10            | 0.013     |
| 50                           | 0.29      | 0.29      | 0.31      | 0.30            | 0.013     |
| 75                           | 0.38      | 0.38      | 0.40      | 0.39            | 0.011     |
| Analyte D (1-3:1 EtOAc-EtOH) |           |           |           |                 |           |
| % 3:1 EtOAc-EtOH             | $R_f$ (1) | $R_f$ (2) | $R_f$ (3) | $R_f$ (average) | Std. dev. |
| 0                            | 0.16      | 0.18      | 0.16      | 0.17            | 0.013     |
| 10                           | 0.36      | 0.36      | 0.34      | 0.36            | 0.013     |
| 25                           | 0.44      | 0.46      | 0.48      | 0.46            | 0.021     |
| 50                           | 0.68      | 0.68      | 0.68      | 0.68            | 0         |
| 75                           | 0.91      | 0.89      | 0.91      | 0.91            | 0.012     |

**Table 8.**  $R_f$  values (n=3) for acetylsalicylic acid (A), ketoprofen (B), caffeine (C), and acetaminophen (D) run in *sec*-butyl acetate (2) modified with 0-75% 3:1 EtOAc-EtOH.

| Analyte A (2-3:1 EtOAc-EtOH) |           |           |           |                 |           |
|------------------------------|-----------|-----------|-----------|-----------------|-----------|
| % 3:1 EtOAc-EtOH             | $R_f$ (1) | $R_f$ (2) | $R_f$ (3) | $R_f$ (average) | Std. dev. |
| 0                            | 0.32      | 0.32      | 0.34      | 0.33            | 0.013     |
| 10                           | 0.48      | 0.50      | 0.46      | 0.48            | 0.021     |
| 25                           | 0.46      | 0.47      | 0.44      | 0.45            | 0.016     |
| 50                           | 0.69      | 0.69      | 0.64      | 0.67            | 0.026     |
| 75                           | 0.73      | 0.75      | 0.73      | 0.74            | 0.012     |
| Analyte B (2-3:1 EtOAc-EtOH) |           |           |           |                 |           |
| % 3:1 EtOAc-EtOH             | $R_f$ (1) | $R_f$ (2) | $R_f$ (3) | $R_f$ (average) | Std. dev. |
| 0                            | 0.51      | 0.53      | 0.53      | 0.53            | 0.013     |
| 10                           | 0.65      | 0.63      | 0.65      | 0.64            | 0.012     |
| 25                           | 0.63      | 0.63      | 0.60      | 0.62            | 0.018     |
| 50                           | 0.80      | 0.82      | 0.84      | 0.82            | 0.023     |
| 75                           | 0.85      | 0.83      | 0.83      | 0.84            | 0.012     |
| Analyte C (2-3:1 EtOAc-EtOH) |           |           |           |                 |           |
| % 3:1 EtOAc-EtOH             | $R_f$ (1) | $R_f$ (2) | $R_f$ (3) | $R_f$ (average) | Std. dev. |
| 0                            | 0.04      | 0.06      | 0.06      | 0.06            | 0.012     |
| 10                           | 0.13      | 0.08      | 0.10      | 0.10            | 0.021     |
| 25                           | 0.16      | 0.18      | 0.16      | 0.17            | 0.012     |
| 50                           | 0.40      | 0.40      | 0.40      | 0.40            | 0         |
| 75                           | 0.56      | 0.54      | 0.54      | 0.55            | 0.012     |
| Analyte D (2-3:1 EtOAc-EtOH) |           |           |           |                 |           |
| % 3:1 EtOAc-EtOH             | $R_f$ (1) | $R_f$ (2) | $R_f$ (3) | $R_f$ (average) | Std. dev. |
| 0                            | 0.18      | 0.14      | 0.14      | 0.15            | 0.024     |
| 10                           | 0.22      | 0.23      | 0.23      | 0.23            | 0.004     |
| 25                           | 0.34      | 0.36      | 0.38      | 0.36            | 0.021     |
| 50                           | 0.65      | 0.59      | 0.59      | 0.61            | 0.036     |
| 75                           | 0.86      | 0.79      | 0.81      | 0.82            | 0.035     |

**Table 9.**  $R_f$  values (n=3) for acetylsalicylic acid (A), ketoprofen (B), caffeine (C), and acetaminophen (D) run in ethyl isobutyrate (3) modified with 0-75% 3:1 EtOAc-EtOH.

| Analyte A (3-3:1 EtOAc-EtOH) |           |           |           |                 |           |
|------------------------------|-----------|-----------|-----------|-----------------|-----------|
| % 3:1 EtOAc-EtOH             | $R_f$ (1) | $R_f$ (2) | $R_f$ (3) | $R_f$ (average) | Std. dev. |
| 0                            | 0.18      | 0.18      | 0.20      | 0.19            | 0.012     |
| 10                           | 0.30      | 0.27      | 0.27      | 0.28            | 0.013     |
| 25                           | 0.42      | 0.44      | 0.44      | 0.44            | 0.013     |
| 50                           | 0.58      | 0.56      | 0.63      | 0.59            | 0.032     |
| 75                           | 0.70      | 0.70      | 0.68      | 0.69            | 0.012     |
| Analyte B (3-3:1 EtOAc-EtOH) |           |           |           |                 |           |
| % 3:1 EtOAc-EtOH             | $R_f$ (1) | $R_f$ (2) | $R_f$ (3) | $R_f$ (average) | Std. dev. |
| 0                            | 0.32      | 0.34      | 0.34      | 0.33            | 0.012     |
| 10                           | 0.48      | 0.48      | 0.45      | 0.47            | 0.014     |
| 25                           | 0.56      | 0.53      | 0.58      | 0.56            | 0.023     |
| 50                           | 0.69      | 0.69      | 0.71      | 0.70            | 0.012     |
| 75                           | 0.80      | 0.80      | 0.80      | 0.80            | 0         |
| Analyte C (3-3:1 EtOAc-EtOH) |           |           |           |                 |           |
| % 3:1 EtOAc-EtOH             | $R_f$ (1) | $R_f$ (2) | $R_f$ (3) | $R_f$ (average) | Std. dev. |
| 0                            | 0.02      | 0.05      | 0         | 0.02            | 0.023     |
| 10                           | 0.08      | 0.08      | 0.08      | 0.08            | 0         |
| 25                           | 0.10      | 0.13      | 0.15      | 0.13            | 0.025     |
| 50                           | 0.32      | 0.32      | 0.30      | 0.31            | 0.012     |
| 75                           | 0.40      | 0.43      | 0.49      | 0.44            | 0.044     |
| Analyte D (3-3:1 EtOAc-EtOH) |           |           |           |                 |           |
| % 3:1 EtOAc-EtOH             | $R_f$ (1) | $R_f$ (2) | $R_f$ (3) | $R_f$ (average) | Std. dev. |
| 0                            | 0.16      | 0.14      | 0.14      | 0.15            | 0.012     |
| 10                           | 0.21      | 0.23      | 0.23      | 0.22            | 0.012     |
| 25                           | 0.38      | 0.38      | 0.40      | 0.38            | 0.011     |
| 50                           | 0.57      | 0.59      | 0.59      | 0.58            | 0.013     |
| 75                           | 0.81      | 0.79      | 0.81      | 0.81            | 0.011     |

**Table 10.**  $R_f$  values (n=3) for acetylsalicylic acid (A), ketoprofen (B), caffeine (C), and acetaminophen (D) run in methyl pivalate (4) modified with 0-75% 3:1 EtOAc-EtOH.

| Analyte A (4-3:1 EtOAc-EtOH) |           |           |           |                 |           |
|------------------------------|-----------|-----------|-----------|-----------------|-----------|
| % 3:1 EtOAc-EtOH             | $R_f$ (1) | $R_f$ (2) | $R_f$ (3) | $R_f$ (average) | Std. dev. |
| 0                            | 0.20      | 0.17      | 0.17      | 0.18            | 0.014     |
| 10                           | 0.31      | 0.29      | 0.29      | 0.30            | 0.013     |
| 25                           | 0.43      | 0.40      | 0.40      | 0.41            | 0.012     |
| 50                           | 0.62      | 0.62      | 0.6       | 0.61            | 0.013     |
| 75                           | 0.76      | 0.74      | 0.74      | 0.75            | 0.012     |
| Analyte B (4-3:1 EtOAc-EtOH) |           |           |           |                 |           |
| % 3:1 EtOAc-EtOH             | $R_f$ (1) | $R_f$ (2) | $R_f$ (3) | $R_f$ (average) | Std. dev. |
| 0                            | 0.24      | 0.27      | 0.24      | 0.25            | 0.014     |
| 10                           | 0.42      | 0.42      | 0.44      | 0.43            | 0.013     |
| 25                           | 0.51      | 0.49      | 0.49      | 0.50            | 0.012     |
| 50                           | 0.70      | 0.65      | 0.67      | 0.67            | 0.022     |
| 75                           | 0.80      | 0.80      | 0.78      | 0.80            | 0.011     |
| Analyte C (4-3:1 EtOAc-EtOH) |           |           |           |                 |           |
| % 3:1 EtOAc-EtOH             | $R_f$ (1) | $R_f$ (2) | $R_f$ (3) | $R_f$ (average) | Std. dev. |
| 0                            | 0         | 0         | 0         | 0               | 0         |
| 10                           | 0.07      | 0.09      | 0.07      | 0.07            | 0.013     |
| 25                           | 0.12      | 0.14      | 0.14      | 0.13            | 0.013     |
| 50                           | 0.38      | 0.33      | 0.33      | 0.35            | 0.026     |
| 75                           | 0.46      | 0.48      | 0.44      | 0.46            | 0.019     |
| Analyte D (4-3:1 EtOAc-EtOH) |           |           |           |                 |           |
| % 3:1 EtOAc-EtOH             | $R_f$ (1) | $R_f$ (2) | $R_f$ (3) | $R_f$ (average) | Std. dev. |
| 0                            | 0.11      | 0.11      | 0.13      | 0.12            | 0.013     |
| 10                           | 0.23      | 0.23      | 0.26      | 0.24            | 0.012     |
| 25                           | 0.39      | 0.39      | 0.41      | 0.39            | 0.012     |
| 50                           | 0.62      | 0.62      | 0.64      | 0.63            | 0.013     |
| 75                           | 0.80      | 0.78      | 0.78      | 0.79            | 0.012     |

## S2.3 Thin Layer Chromatography (TLC) - Test Solvent Mixtures Modified with 3:1 EtOAc-EtOH

**Table 11** .  $R_f$  values for analyte mixtures 4-aminophenol/acetaminophen and ibuprofen/ ketoprofen run in DCM modified with 10% 3:1 EtOAc-EtOH and *tert*-butyl acetate (1), *sec*-butyl acetate (2), ethyl isobutyrate (3) and methyl pivalate (4) modified with 25% 3:1 EtOAc-EtOH.

| 4-Aminophenol    |             |           |           |           |           |
|------------------|-------------|-----------|-----------|-----------|-----------|
| % 3:1 EtOAc-EtOH | $R_f$ (DCM) | $R_f$ (1) | $R_f$ (2) | $R_f$ (3) | $R_f$ (4) |
| 10               | 0.25        | -         | -         | -         | -         |
| 25               | -           | 0.52      | 0.52      | 0.48      | 0.48      |
| Acetaminophen    |             |           |           |           |           |
| % 3:1 EtOAc-EtOH | $R_f$ (DCM) | $R_f$ (1) | $R_f$ (2) | $R_f$ (3) | $R_f$ (4) |
| 10               | 0.14        | -         | -         | -         | -         |
| 25               | -           | 0.41      | 0.40      | 0.35      | 0.37      |
| Ibuprofen        |             |           |           |           |           |
| % 3:1 EtOAc-EtOH | $R_f$ (DCM) | $R_f$ (1) | $R_f$ (2) | $R_f$ (3) | $R_f$ (4) |
| 10               | 0.43        | -         | -         | -         | -         |
| 25               | -           | 0.74      | 0.74      | 0.63      | 0.75      |
| Ketoprofen       |             |           |           |           |           |
| % 3:1 EtOAc-EtOH | $R_f$ (DCM) | $R_f$ (1) | $R_f$ (2) | $R_f$ (3) | $R_f$ (4) |
| 10               | 0.70        | -         | -         | -         | -         |
| 25               | -           | 0.57      | 0.52      | 0.48      | 0.50      |

## S2.4 Linear Regression Analysis

Simple linear regressions were performed in Excel (ANOVA) on TLC data sets that would yield undefined KBI results. These cases include analytes A, B, and C run in DCM and analyte C run in methyl pivalate wherein, at the dilute eluent limit,  $\ln(k)$  is undefined ( $R_f = 0$ ). Predicted  $R_f$  are used in the calculation of KBIs and linear equations,  $R^2$  values, and p-values are shown in the tables below.

**Table 12** . Linear regression analysis data (linear equation for predicted  $R_f$  values,  $R^2$ , p-value) for acetylsalicylic acid (A), ketoprofen (B) and caffeine (C) run in DCM modified with MeOH.

| DCM-MeOH |                        |       |         |
|----------|------------------------|-------|---------|
| Analyte  | Equation               | $R^2$ | p-value |
| A        | $y = 0.1493x + 0.1112$ | 0.914 | 0.01    |
| B        | $y = 0.1656x + 0.0718$ | 0.976 | 0.002   |
| C        | $y = 0.1742x + 0.0014$ | 0.981 | 0.001   |

**Table 13** . Linear regression analysis data (linear equation for predicted  $R_f$  values,  $R^2$ , p-value) for acetylsalicylic acid (A), ketoprofen (B) and caffeine (C) run in DCM modified with 3:1 EtOAc-EtOH.

| DCM-3:1 EtOAc-EtOH |                        |       |         |
|--------------------|------------------------|-------|---------|
| Analyte            | Equation               | $R^2$ | p-value |
| A                  | $y = 0.0869x + 0.1689$ | 0.804 | 0.04    |
| B                  | $y = 0.0919x + 0.211$  | 0.778 | 0.05    |
| C                  | $y = 0.0566x + 0.1332$ | 0.757 | 0.05    |

**Table 14** . Linear regression analysis data (linear equation for predicted  $R_f$  values,  $R^2$ , p-value) for caffeine (C) run in methyl pivalate (4) modified with MeOH.

| 4-MeOH  |                        |       |         |
|---------|------------------------|-------|---------|
| Analyte | Equation               | $R^2$ | p-value |
| C       | $y = 0.0733x + 0.0191$ | 0.923 | 0.009   |

**Table 15** . Linear regression analysis data (linear equation for predicted  $R_f$  values,  $R^2$ , p-value) for caffeine (C) run in methyl pivalate (4) modified with 3:1 EtOAc-EtOH.

| 4-3:1 EtOAc-EtOH |                       |       |         |
|------------------|-----------------------|-------|---------|
| Analyte          | Equation              | $R^2$ | p-value |
| C                | $y = 0.0565x + 0.001$ | 0.986 | 0.0006  |

## S2.5 Calculation of $\ln(k)$ Terms

**Table 16**. Calculation of  $\ln(k)$  terms for acetylsalicylic acid (A), ketoprofen (B), caffeine (C), and acetaminophen (D) run in DCM modified with MeOH.  $R_f$  terms used in calculations for analytes A, B, and C are the predicted terms calculated from linear regression (LR) analysis found in S2.4.

| Analyte A (DCM-MeOH)        |            |       |          |
|-----------------------------|------------|-------|----------|
| MeOH (mol/dm <sup>3</sup> ) | $R_f$ (LR) | k     | $\ln(k)$ |
| 0                           | 0.11       | 7.99  | 2.08     |
| 0.49                        | 0.19       | 4.40  | 1.48     |
| 1.2                         | 0.30       | 2.38  | 0.867    |
| 2.5                         | 0.48       | 1.08  | 0.079    |
| 4.9                         | 0.85       | 0.177 | -1.73    |
| Analyte B (DCM-MeOH)        |            |       |          |
| MeOH (mol/dm <sup>3</sup> ) | $R_f$ (LR) | k     | $\ln(k)$ |
| 0                           | 0.07       | 12.9  | 2.56     |
| 0.49                        | 0.15       | 5.51  | 1.71     |
| 1.2                         | 0.28       | 2.62  | 0.962    |
| 2.5                         | 0.48       | 1.08  | 0.075    |
| 4.9                         | 0.89       | 0.12  | -2.10    |
| Analyte C (DCM-MeOH)        |            |       |          |
| MeOH (mol/dm <sup>3</sup> ) | $R_f$ (LR) | k     | $\ln(k)$ |
| 0                           | 0.001      | 731   | 6.59     |
| 0.49                        | 0.09       | 10.4  | 2.34     |
| 1.2                         | 0.22       | 3.62  | 1.29     |
| 2.5                         | 0.43       | 1.32  | 0.274    |
| 4.9                         | 0.86       | 0.16  | -1.84    |
| Analyte D (DCM-MeOH)        |            |       |          |
| MeOH (mol/dm <sup>3</sup> ) | $R_f$      | k     | $\ln(k)$ |
| 0                           | 0.03       | 39.0  | 3.66     |
| 0.49                        | 0.06       | 14.8  | 2.69     |
| 1.2                         | 0.34       | 1.91  | 0.649    |
| 2.5                         | 0.61       | 0.645 | -0.438   |
| 4.9                         | 0.94       | 0.07  | -2.71    |

**Table 17.** Calculation of  $\ln(k)$  terms for acetylsalicylic acid (A), ketoprofen (B), caffeine (C), and acetaminophen (D) run in *tert*-butyl acetate (1) modified with MeOH.

| Analyte A (1-MeOH)          |                |       |        |
|-----------------------------|----------------|-------|--------|
| MeOH (mol/dm <sup>3</sup> ) | R <sub>f</sub> | k     | ln (k) |
| 0                           | 0.23           | 3.35  | 1.21   |
| 0.49                        | 0.35           | 1.86  | 0.623  |
| 1.2                         | 0.57           | 0.766 | -0.266 |
| 2.5                         | 0.67           | 0.494 | -0.705 |
| 4.9                         | 0.72           | 0.382 | -0.963 |
| Analyte B (1-MeOH)          |                |       |        |
| MeOH (mol/dm <sup>3</sup> ) | R <sub>f</sub> | k     | ln (k) |
| 0                           | 0.35           | 1.87  | 0.627  |
| 0.49                        | 0.40           | 1.52  | 0.422  |
| 1.2                         | 0.54           | 0.863 | -0.147 |
| 2.5                         | 0.69           | 0.458 | -0.780 |
| 4.9                         | 0.80           | 0.255 | -1.37  |
| Analyte C (1-MeOH)          |                |       |        |
| MeOH (mol/dm <sup>3</sup> ) | R <sub>f</sub> | k     | ln (k) |
| 0                           | 0.01           | 68.0  | 4.22   |
| 0.49                        | 0.06           | 15.6  | 2.74   |
| 1.2                         | 0.15           | 5.48  | 1.70   |
| 2.5                         | 0.34           | 1.95  | 0.669  |
| 4.9                         | 0.40           | 1.51  | 0.412  |
| Analyte D (1-MeOH)          |                |       |        |
| MeOH (mol/dm <sup>3</sup> ) | R <sub>f</sub> | k     | ln (k) |
| 0                           | 0.17           | 5.00  | 1.609  |
| 0.49                        | 0.28           | 2.63  | 0.968  |
| 1.2                         | 0.46           | 1.19  | 0.177  |
| 2.5                         | 0.66           | 0.512 | -0.669 |
| 4.9                         | 0.71           | 0.413 | -0.884 |

**Table 18.** Calculation of  $\ln(k)$  terms for acetylsalicylic acid (A), ketoprofen (B), caffeine (C), and acetaminophen (D) run in *sec*-butyl acetate (2) modified with MeOH.

| Analyte A (2-MeOH)          |                |       |        |
|-----------------------------|----------------|-------|--------|
| MeOH (mol/dm <sup>3</sup> ) | R <sub>f</sub> | k     | ln (k) |
| 0                           | 0.33           | 2.069 | 0.727  |
| 0.49                        | 0.41           | 1.46  | 0.383  |
| 1.2                         | 0.51           | 0.961 | -0.041 |
| 2.5                         | 0.57           | 0.747 | -0.291 |
| 4.9                         | 0.64           | 0.579 | -0.547 |
| Analyte B (2-MeOH)          |                |       |        |
| MeOH (mol/dm <sup>3</sup> ) | R <sub>f</sub> | k     | ln (k) |
| 0                           | 0.47           | 1.14  | 0.134  |
| 0.49                        | 0.55           | 0.814 | -0.206 |
| 1.2                         | 0.57           | 0.765 | -0.268 |
| 2.5                         | 0.61           | 0.630 | -0.463 |
| 4.9                         | 0.65           | 0.539 | -0.617 |
| Analyte C (2-MeOH)          |                |       |        |
| MeOH (mol/dm <sup>3</sup> ) | R <sub>f</sub> | k     | ln (k) |
| 0                           | 0.06           | 17.0  | 2.83   |
| 0.49                        | 0.04           | 22.8  | 3.13   |
| 1.2                         | 0.103          | 8.73  | 2.17   |
| 2.5                         | 0.27           | 2.67  | 0.981  |
| 4.9                         | 0.35           | 1.87  | 0.627  |
| Analyte D (2-MeOH)          |                |       |        |
| MeOH (mol/dm <sup>3</sup> ) | R <sub>f</sub> | k     | ln (k) |
| 0                           | 0.15           | 5.50  | 1.704  |
| 0.49                        | 0.33           | 2.01  | 0.700  |
| 1.2                         | 0.41           | 1.42  | 0.350  |
| 2.5                         | 0.52           | 0.934 | -0.069 |
| 4.9                         | 0.60           | 0.667 | -0.405 |



**Table 19.** Calculation of  $\ln(k)$  terms for acetylsalicylic acid (A), ketoprofen (B), caffeine (C), and acetaminophen (D) run in ethyl isobutyrate (3) modified with MeOH.

| Analyte A (3-MeOH)          |                |       |        |
|-----------------------------|----------------|-------|--------|
| MeOH (mol/dm <sup>3</sup> ) | R <sub>f</sub> | k     | ln (k) |
| 0                           | 0.18           | 4.52  | 1.51   |
| 0.49                        | 0.31           | 2.23  | 0.804  |
| 1.2                         | 0.47           | 1.12  | 0.114  |
| 2.5                         | 0.51           | 0.962 | -0.039 |
| 4.9                         | 0.65           | 0.545 | -0.607 |
| Analyte B (3-MeOH)          |                |       |        |
| MeOH (mol/dm <sup>3</sup> ) | R <sub>f</sub> | k     | ln (k) |
| 0                           | 0.33           | 2.00  | 0.693  |
| 0.49                        | 0.35           | 1.89  | 0.639  |
| 1.2                         | 0.49           | 1.03  | 0.029  |
| 2.5                         | 0.54           | 0.847 | -0.166 |
| 4.9                         | 0.66           | 0.514 | -0.665 |
| Analyte C (3-MeOH)          |                |       |        |
| MeOH (mol/dm <sup>3</sup> ) | R <sub>f</sub> | k     | ln (k) |
| 0                           | 0.01           | 87.0  | 4.47   |
| 0.49                        | 0.05           | 17.3  | 2.85   |
| 1.2                         | 0.13           | 6.89  | 1.93   |
| 2.5                         | 0.26           | 2.84  | 1.04   |
| 4.9                         | 0.38           | 1.64  | 0.493  |
| Analyte D (3-MeOH)          |                |       |        |
| MeOH (mol/dm <sup>3</sup> ) | R <sub>f</sub> | k     | ln (k) |
| 0                           | 0.15           | 5.82  | 1.76   |
| 0.49                        | 0.21           | 3.85  | 1.35   |
| 1.2                         | 0.37           | 1.73  | 0.548  |
| 2.5                         | 0.50           | 0.990 | -0.011 |
| 4.9                         | 0.60           | 0.663 | -0.411 |

**Table 20.** Calculation of  $\ln(k)$  terms for acetylsalicylic acid (A), ketoprofen (B), caffeine (C), and acetaminophen (D) run in methyl pivalate (4) modified with MeOH.  $R_f$  terms used in calculations for analyte C are the predicted terms calculated from linear regression (LR) analysis found in S2.4.

| Analyte A (4-MeOH)          |            |       |          |
|-----------------------------|------------|-------|----------|
| MeOH (mol/dm <sup>3</sup> ) | $R_f$      | k     | $\ln(k)$ |
| 0                           | 0.18       | 4.59  | 1.52     |
| 0.49                        | 0.31       | 2.18  | 0.779    |
| 1.2                         | 0.45       | 1.25  | 0.219    |
| 2.5                         | 0.52       | 0.906 | -0.098   |
| 4.9                         | 0.66       | 0.515 | -0.664   |
| Analyte B (4-MeOH)          |            |       |          |
| MeOH (mol/dm <sup>3</sup> ) | $R_f$      | k     | $\ln(k)$ |
| 0                           | 0.25       | 2.97  | 1.09     |
| 0.49                        | 0.29       | 2.41  | 0.878    |
| 1.2                         | 0.48       | 1.09  | 0.082    |
| 2.5                         | 0.54       | 0.857 | -0.155   |
| 4.9                         | 0.73       | 0.378 | -0.974   |
| Analyte C (4-MeOH)          |            |       |          |
| MeOH (mol/dm <sup>3</sup> ) | $R_f$ (LR) | k     | $\ln(k)$ |
| 0                           | 0.02       | 51.3  | 3.94     |
| 0.49                        | 0.06       | 17.1  | 2.84     |
| 1.2                         | 0.11       | 8.12  | 2.09     |
| 2.5                         | 0.20       | 3.99  | 1.38     |
| 4.9                         | 0.38       | 1.62  | 0.483    |
| Analyte D (4-MeOH)          |            |       |          |
| MeOH (mol/dm <sup>3</sup> ) | $R_f$      | k     | $\ln(k)$ |
| 0                           | 0.12       | 7.44  | 2.01     |
| 0.49                        | 0.19       | 4.39  | 1.48     |
| 1.2                         | 0.31       | 2.21  | 0.795    |
| 2.5                         | 0.54       | 0.846 | -0.167   |
| 4.9                         | 0.65       | 0.552 | -0.595   |

**Table 21.** Calculation of  $\ln(k)$  terms for acetylsalicylic acid (A), ketoprofen (B), caffeine (C), and acetaminophen (D) run in DCM modified with 3:1 EtOAc-EtOH.  $R_f$  terms used in calculations for analytes A, B, and C are the predicted terms calculated from linear regression (LR) analysis found in S2.4.

| Analyte A (DCM-3:1 EtOAc-EtOH)        |            |       |          |
|---------------------------------------|------------|-------|----------|
| 3:1 EtOAc-EtOH (mol/dm <sup>3</sup> ) | $R_f$ (LR) | k     | $\ln(k)$ |
| 0                                     | 0.17       | 4.92  | 1.59     |
| 1.1                                   | 0.27       | 2.75  | 1.01     |
| 2.8                                   | 0.41       | 1.42  | 0.356    |
| 5.6                                   | 0.66       | 0.53  | -0.641   |
| 8.4                                   | 0.89       | 0.113 | -2.18    |
| Analyte B (DCM-3:1 EtOAc-EtOH)        |            |       |          |
| 3:1 EtOAc-EtOH (mol/dm <sup>3</sup> ) | $R_f$ (LR) | k     | $\ln(k)$ |
| 0                                     | 0.21       | 3.74  | 1.32     |
| 1.1                                   | 0.31       | 2.19  | 0.782    |
| 2.8                                   | 0.47       | 1.14  | 0.128    |
| 5.6                                   | 0.73       | 0.379 | -0.970   |
| 8.4                                   | 0.98       | 0.018 | -4.01    |
| Analyte C (DCM-3:1 EtOAc-EtOH)        |            |       |          |
| 3:1 EtOAc-EtOH (mol/dm <sup>3</sup> ) | $R_f$ (LR) | k     | $\ln(k)$ |
| 0                                     | 0.13       | 6.51  | 1.87     |
| 1.1                                   | 0.20       | 4.09  | 1.41     |
| 2.8                                   | 0.29       | 2.43  | 0.889    |
| 5.6                                   | 0.45       | 1.22  | 0.202    |
| 8.4                                   | 0.61       | 0.645 | -0.438   |
| Analyte D (DCM-3:1 EtOAc-EtOH)        |            |       |          |
| 3:1 EtOAc-EtOH (mol/dm <sup>3</sup> ) | $R_f$      | k     | $\ln(k)$ |
| 0                                     | 0.03       | 39.0  | 3.66     |
| 1.1                                   | 0.16       | 5.27  | 1.66     |
| 2.8                                   | 0.46       | 1.16  | 0.145    |
| 5.6                                   | 0.72       | 0.392 | -0.937   |
| 8.4                                   | 0.83       | 0.210 | -1.56    |

**Table 22.** Calculation of  $\ln(k)$  terms for acetylsalicylic acid (A), ketoprofen (B), caffeine (C), and acetaminophen (D) run in *tert*-butyl acetate (1) modified with 3:1 EtOAc-EtOH.

| Analyte A (1-3:1 EtOAc-EtOH)          |                |       |        |
|---------------------------------------|----------------|-------|--------|
| 3:1 EtOAc-EtOH (mol/dm <sup>3</sup> ) | R <sub>f</sub> | k     | ln (k) |
| 0                                     | 0.23           | 3.35  | 1.21   |
| 1.1                                   | 0.32           | 2.14  | 0.761  |
| 2.8                                   | 0.45           | 1.20  | 0.185  |
| 5.6                                   | 0.62           | 0.62  | -0.472 |
| 8.4                                   | 0.79           | 0.26  | -1.35  |
| Analyte B (1-3:1 EtOAc-EtOH)          |                |       |        |
| 3:1 EtOAc-EtOH (mol/dm <sup>3</sup> ) | R <sub>f</sub> | k     | ln (k) |
| 0                                     | 0.29           | 2.4   | 0.906  |
| 1.1                                   | 0.50           | 1.00  | 0      |
| 2.8                                   | 0.62           | 0.605 | -0.503 |
| 5.6                                   | 0.73           | 0.369 | -0.997 |
| 8.4                                   | 0.87           | 0.148 | -1.91  |
| Analyte C (1-3:1 EtOAc-EtOH)          |                |       |        |
| 3:1 EtOAc-EtOH (mol/dm <sup>3</sup> ) | R <sub>f</sub> | k     | ln (k) |
| 0                                     | 0.01           | 68.0  | 4.22   |
| 1.1                                   | 0.06           | 15.1  | 2.72   |
| 2.8                                   | 0.10           | 9.38  | 2.24   |
| 5.6                                   | 0.30           | 2.38  | 0.865  |
| 8.4                                   | 0.39           | 1.56  | 0.443  |
| Analyte D (1-3:1 EtOAc-EtOH)          |                |       |        |
| 3:1 EtOAc-EtOH (mol/dm <sup>3</sup> ) | R <sub>f</sub> | k     | ln (k) |
| 0                                     | 0.17           | 5.00  | 1.609  |
| 1.1                                   | 0.36           | 1.81  | 0.593  |
| 2.8                                   | 0.46           | 1.18  | 0.167  |
| 5.6                                   | 0.68           | 0.467 | -0.762 |
| 8.4                                   | 0.91           | 0.102 | -2.29  |

**Table 23.** Calculation of  $\ln(k)$  terms for acetylsalicylic acid (A), ketoprofen (B), caffeine (C), and acetaminophen (D) run in *sec*-butyl acetate (2) modified with 3:1 EtOAc-EtOH.

| Analyte A (2-3:1 EtOAc-EtOH)          |                |       |        |
|---------------------------------------|----------------|-------|--------|
| 3:1 EtOAc-EtOH (mol/dm <sup>3</sup> ) | R <sub>f</sub> | k     | ln (k) |
| 0                                     | 0.33           | 2.10  | 0.727  |
| 1.1                                   | 0.48           | 1.087 | 0.083  |
| 2.8                                   | 0.45           | 1.20  | 0.186  |
| 5.6                                   | 0.67           | 0.484 | -0.727 |
| 8.4                                   | 0.74           | 0.358 | -1.03  |
| Analyte B (2-3:1 EtOAc-EtOH)          |                |       |        |
| 3:1 EtOAc-EtOH (mol/dm <sup>3</sup> ) | R <sub>f</sub> | k     | ln (k) |
| 0                                     | 0.53           | 0.901 | -0.104 |
| 1.1                                   | 0.64           | 0.565 | -0.571 |
| 2.8                                   | 0.62           | 0.613 | -0.490 |
| 5.6                                   | 0.82           | 0.223 | -1.50  |
| 8.4                                   | 0.84           | 0.190 | -1.66  |
| Analyte C (2-3:1 EtOAc-EtOH)          |                |       |        |
| 3:1 EtOAc-EtOH (mol/dm <sup>3</sup> ) | R <sub>f</sub> | k     | ln (k) |
| 0                                     | 0.06           | 17.0  | 2.83   |
| 1.1                                   | 0.10           | 8.60  | 2.15   |
| 2.8                                   | 0.17           | 5.00  | 1.61   |
| 5.6                                   | 0.40           | 1.47  | 0.386  |
| 8.4                                   | 0.55           | 0.829 | -0.187 |
| Analyte D (2-3:1 EtOAc-EtOH)          |                |       |        |
| 3:1 EtOAc-EtOH (mol/dm <sup>3</sup> ) | R <sub>f</sub> | k     | ln (k) |
| 0                                     | 0.15           | 5.50  | 1.70   |
| 1.1                                   | 0.23           | 3.41  | 1.23   |
| 2.8                                   | 0.36           | 1.77  | 0.569  |
| 5.6                                   | 0.61           | 0.645 | -0.439 |
| 8.4                                   | 0.82           | 0.218 | -1.52  |

**Table 24.** Calculation of  $\ln(k)$  terms for acetylsalicylic acid (A), ketoprofen (B), caffeine (C), and acetaminophen (D) run in ethyl isobutyrate (3) modified with 3:1 EtOAc-EtOH.

| Analyte A (3-3:1 EtOAc-EtOH)          |                |       |        |
|---------------------------------------|----------------|-------|--------|
| 3:1 EtOAc-EtOH (mol/dm <sup>3</sup> ) | R <sub>f</sub> | k     | ln (k) |
| 0                                     | 0.19           | 4.36  | 1.47   |
| 1.1                                   | 0.28           | 2.57  | 0.943  |
| 2.8                                   | 0.44           | 1.29  | 0.253  |
| 5.6                                   | 0.59           | 0.694 | -0.365 |
| 8.4                                   | 0.69           | 0.442 | -0.816 |
| Analyte B (3-3:1 EtOAc-EtOH)          |                |       |        |
| 3:1 EtOAc-EtOH (mol/dm <sup>3</sup> ) | R <sub>f</sub> | k     | ln (k) |
| 0                                     | 0.33           | 2.00  | 0.693  |
| 1.1                                   | 0.47           | 1.14  | 0.134  |
| 2.8                                   | 0.56           | 0.792 | -0.234 |
| 5.6                                   | 0.70           | 0.427 | -0.851 |
| 8.4                                   | 0.80           | 0.250 | -1.39  |
| Analyte C (3-3:1 EtOAc-EtOH)          |                |       |        |
| 3:1 EtOAc-EtOH (mol/dm <sup>3</sup> ) | R <sub>f</sub> | k     | ln (k) |
| 0                                     | 0.01           | 87.0  | 4.47   |
| 1.1                                   | 0.08           | 12.3  | 2.51   |
| 2.8                                   | 0.13           | 7.00  | 1.95   |
| 5.6                                   | 0.31           | 2.19  | 0.785  |
| 8.4                                   | 0.44           | 1.27  | 0.242  |
| Analyte D (3-3:1 EtOAc-EtOH)          |                |       |        |
| 3:1 EtOAc-EtOH (mol/dm <sup>3</sup> ) | R <sub>f</sub> | k     | ln (k) |
| 0                                     | 0.15           | 5.82  | 1.76   |
| 1.1                                   | 0.22           | 3.50  | 1.25   |
| 2.8                                   | 0.38           | 1.61  | 0.474  |
| 5.6                                   | 0.58           | 0.725 | -0.322 |
| 8.4                                   | 0.81           | 0.242 | -1.42  |

**Table 25.** Calculation of  $\ln(k)$  terms for acetylsalicylic acid (A), ketoprofen (B), caffeine (C), and acetaminophen (D) run in methyl pivalate (4) modified with 3:1 EtOAc-EtOH.  $R_f$  terms used in calculations for analyte C are the predicted terms calculated from linear regression (LR) analysis found in S2.4.

| Analyte A (4-3:1 EtOAc-EtOH)          |            |       |          |
|---------------------------------------|------------|-------|----------|
| 3:1 EtOAc-EtOH (mol/dm <sup>3</sup> ) | $R_f$      | k     | $\ln(k)$ |
| 0                                     | 0.18       | 4.59  | 1.52     |
| 1.1                                   | 0.30       | 2.38  | 0.865    |
| 2.8                                   | 0.41       | 1.43  | 0.358    |
| 5.6                                   | 0.61       | 0.627 | -0.468   |
| 8.4                                   | 0.75       | 0.339 | -1.08    |
| Analyte B (4-3:1 EtOAc-EtOH)          |            |       |          |
| 3:1 EtOAc-EtOH (mol/dm <sup>3</sup> ) | $R_f$      | k     | $\ln(k)$ |
| 0                                     | 0.25       | 2.97  | 1.09     |
| 1.1                                   | 0.43       | 1.33  | 0.28     |
| 2.8                                   | 0.50       | 1.01  | 0.014    |
| 5.6                                   | 0.67       | 0.483 | -0.726   |
| 8.4                                   | 0.80       | 0.254 | -1.37    |
| Analyte C (4-3:1 EtOAc-EtOH)          |            |       |          |
| 3:1 EtOAc-EtOH (mol/dm <sup>3</sup> ) | $R_f$ (LR) | k     | $\ln(k)$ |
| 0                                     | 0.0001     | 1020  | 6.93     |
| 1.1                                   | 0.06       | 14.6  | 2.68     |
| 2.8                                   | 0.16       | 5.29  | 1.67     |
| 5.6                                   | 0.32       | 2.16  | 0.768    |
| 8.4                                   | 0.47       | 1.11  | 0.101    |
| Analyte D (4-3:1 EtOAc-EtOH)          |            |       |          |
| 3:1 EtOAc-EtOH (mol/dm <sup>3</sup> ) | $R_f$      | k     | $\ln(k)$ |
| 0                                     | 0.12       | 7.44  | 2.01     |
| 1.1                                   | 0.24       | 3.15  | 1.15     |
| 2.8                                   | 0.39       | 1.53  | 0.428    |
| 5.6                                   | 0.63       | 0.588 | -0.531   |
| 8.4                                   | 0.79       | 0.271 | -1.30    |

## S.26 Calculation of KBI Terms with Fitting

**Table 26.** Calculation of KBI terms for analytes acetylsalicylic acid (A), ketoprofen (B), caffeine (C), and acetaminophen (D) analytes in test solvents DCM, *tert*-butyl acetate (1), *sec*-butyl acetate (2), ethyl isobutyrate (3), and methyl pivalate (4), modified with MeOH. The ln(k) data from S2.5 was fit to a convenient function which is reported in the above table along with R<sup>2</sup> values and KBIs.

| Analyte A (MeOH) |                                                 |                |          |
|------------------|-------------------------------------------------|----------------|----------|
| Solvent          | Equation                                        | R <sup>2</sup> | KBI term |
| DCM              | $y = -0.0358x^3 + 0.2797x^2 - 1.2764x + 2.0698$ | 0.9999         | 1.28     |
| 1                | $y = -0.0425x^3 + 0.4577x^2 - 1.6705x + 1.2501$ | 0.9954         | 1.67     |
| 2                | $y = -0.0254x^3 + 0.253x^2 - 0.8885x + 0.7383$  | 0.9989         | 0.889    |
| 3                | $y = -0.0831x^3 + 0.6989x^2 - 1.8555x + 1.5243$ | 0.9991         | 1.86     |
| 4                | $y = -0.0681x^3 + 0.5893x^2 - 1.6884x + 1.5102$ | 0.9993         | 1.69     |
| Analyte B (MeOH) |                                                 |                |          |
| Solvent          | Equation                                        | R <sup>2</sup> | KBI term |
| DCM              | $y = -0.0625x^3 + 0.4854x^2 - 1.8104x + 2.5386$ | 0.9997         | 1.81     |
| 1                | $y = 0.0144x^3 - 0.0351x^2 - 0.5877x + 0.655$   | 0.9973         | 0.588    |
| 2                | $y = -0.0196x^3 + 0.1754x^2 - 0.534x + 0.0986$  | 0.9631         | 0.534    |
| 3                | $y = -0.0117x^3 + 0.1279x^2 - 0.634x + 0.7624$  | 0.964          | 0.634    |
| 4                | $y = -0.0341x^3 + 0.3004x^2 - 1.084x + 1.1654$  | 0.9787         | 1.08     |
| Analyte C (MeOH) |                                                 |                |          |
| Solvent          | Equation                                        | R <sup>2</sup> | KBI term |
| DCM              | $y = 0.4034x^2 - 3.4176x + 5.3763$              | 0.8823         | 3.42     |
| 1                | $y = 0.2823x^2 - 2.1118x + 3.9867$              | 0.9828         | 2.11     |
| 2                | $y = 0.1074x^2 - 1.0597x + 3.1909$              | 0.9196         | 1.06     |
| 3                | $y = 0.1872x^2 - 1.5637x + 3.6658$              | 0.9951         | 1.56     |
| 4                | $y = 0.1506x^2 - 1.3923x + 3.7207$              | 0.9779         | 1.39     |
| Analyte D (MeOH) |                                                 |                |          |
| Solvent          | Equation                                        | R <sup>2</sup> | KBI term |
| DCM              | $y = -0.0882x^3 + 0.8253x^2 - 3.2407x + 3.7959$ | 0.9933         | 3.24     |
| 1                | $y = -0.0058x^3 + 0.212x^2 - 1.4112x + 1.611$   | 1              | 1.41     |
| 2                | $y = -0.0743x^3 + 0.6562x^2 - 1.8399x + 1.6295$ | 0.9795         | 1.84     |
| 3                | $y = -0.0147x^3 + 0.2277x^2 - 1.2146x + 1.8016$ | 0.9951         | 1.21     |
| 4                | $y = 0.0146x^3 + 0.0335x^2 - 1.0478x + 2.0006$  | 0.9999         | 1.05     |



**Table 27.** Calculation of KBI terms for analytes acetylsalicylic acid (A), ketoprofen (B), caffeine (C), and acetaminophen (D) analytes in test solvents DCM, *tert*-butyl acetate (1), *sec*-butyl acetate (2), ethyl isobutyrate (3), and methyl pivalate (4), modified with 3:1 EtOAc-EtOH. The  $\ln(k)$  data from S2.5 was fit to a convenient function which is reported in the above table along with  $R^2$  values and KBIs.

| Analyte A (3:1 EtOAc-EtOH) |                                                 |        |          |
|----------------------------|-------------------------------------------------|--------|----------|
| Solvent                    | Equation                                        | $R^2$  | KBI term |
| DCM                        | $y = -0.006x^3 + 0.066x^2 - 0.5807x + 1.5924$   | 1      | 0.581    |
| 1                          | $y = -0.0039x^3 + 0.0545x^2 - 0.4852x + 1.2193$ | 0.9998 | 0.485    |
| 2                          | $y = 0.0011x^3 - 0.0061x^2 - 0.2259x + 0.6142$  | 0.9285 | 0.226    |
| 3                          | $y = -0.0026x^3 + 0.0572x^2 - 0.5711x + 1.4842$ | 0.9995 | 0.571    |
| 4                          | $y = -0.0027x^3 + 0.0516x^2 - 0.5509x + 1.4936$ | 0.9976 | 0.551    |
| Analyte B (3:1 EtOAc-EtOH) |                                                 |        |          |
| Solvent                    | Equation                                        | $R^2$  | KBI term |
| DCM                        | $y = -0.0146x^3 + 0.1239x^2 - 0.6524x + 1.3358$ | 0.9998 | 0.652    |
| 1                          | $y = -0.0119x^3 + 0.1659x^2 - 0.8859x + 0.875$  | 0.9975 | 0.886    |
| 2                          | $y = 0.0056x^3 - 0.0623x^2 - 0.044x - 0.2059$   | 0.9359 | 0.044    |
| 3                          | $y = -0.0034x^3 + 0.0551x^2 - 0.4695x + 0.6641$ | 0.9964 | 0.469    |
| 4                          | $y = -0.0056x^3 + 0.0847x^2 - 0.6011x + 1.0202$ | 0.9854 | 0.601    |
| Analyte C (3:1 EtOAc-EtOH) |                                                 |        |          |
| Solvent                    | Equation                                        | $R^2$  | KBI term |
| DCM                        | $y = 0.011x^2 - 0.3621x + 1.8381$               | 0.9984 | 0.362    |
| 1                          | $y = 0.0503x^2 - 0.8446x + 4.0049$              | 0.9724 | 0.845    |
| 2                          | $y = 0.0209x^2 - 0.5363x + 2.8148$              | 0.9947 | 0.536    |
| 3                          | $y = 0.064x^2 - 0.9864x + 4.1046$               | 0.8532 | 0.986    |
| 4                          | $y = 0.1486x^2 - 1.9059x + 5.9605$              | 0.8792 | 1.91     |
| Analyte D (3:1 EtOAc-EtOH) |                                                 |        |          |
| Solvent                    | Equation                                        | $R^2$  | KBI term |
| DCM                        | $y = -0.0172x^3 + 0.3086x^2 - 2.0002x + 3.6266$ | 0.9991 | 2        |
| 1                          | $y = -0.0121x^3 + 0.1501x^2 - 0.864x + 1.5444$  | 0.9945 | 0.864    |
| 2                          | $y = -0.0015x^3 + 0.0206x^2 - 0.4513x + 1.705$  | 1      | 0.451    |
| 3                          | $y = -0.0046x^3 + 0.0645x^2 - 0.5955x + 1.7856$ | 0.9989 | 0.595    |
| 4                          | $y = -0.0048x^3 + 0.0865x^2 - 0.7782x + 1.9798$ | 0.9988 | 0.778    |

## SI References

- 1 M.J. Kamlet, J.L. Abboud and R.W. Taft. *J. Am. Chem. Soc.* 1977, 99, 18, 6027–6038.
- 2 F. P. Byrne, B. Forier, G. Bossaert, C. Hoebbers, T. J. Farmer and A. J. Hunt, *Green Chemistry*, 2018, **20**, 4003-4011.
- 3 M.J. Kamlet and R.W. Taft. *J. Am. Chem. Soc.* 1976, 98, **2**, 377–383.
- 4 S. K. Poole and C. F. Poole, *Chromatographia*, 2001, **53**, S162-S166.
- 5 M.H. Abraham and J.C. McGowan. *Chromatographia*, 1987, 23, 243-246.

## Appendix A

Here we provide the derivations of key relationships that have been used in Section 2.4. Following the standard chromatography theory, we consider the two phases, the mobile phase ( $\alpha = M$ ) and the stationary phase ( $\alpha = S$ ) under instantaneous equilibrium. The molecular species present are analyte ( $i = a$ ) solvent ( $i = s$ ), and two eluents ( $i = e_1$  and  $e_2$ ). Our presentation here is restricted up to two eluent species, yet it is possible to extend this theory to incorporate more solvent species. Under constant pressure and temperature, the solvation free energy an analyte,  $\mu_a^{(\alpha)*}$ , in phase  $\alpha$  can be expressed as<sup>1,2</sup>

$$-d\mu_a^{(\alpha)*} = \sum_{i=s,e_1,e_2} c_i G_{ai}^{(\alpha)} d\mu_i \quad (\text{A.1})$$

where  $\mu_i$  is the chemical potential of the species  $i$ ,  $G_{ai}^{(\alpha)}$  is the Kirkwood-Buff integral (KBI) between analyte and species  $i$ , and  $c_i$  is the bulk number density of the species  $i$  which has been assumed to be the same for both phases; following the standard chromatography theory,  $\mu_i$  is the same for both phases due to instantaneous equilibrium<sup>3</sup> and the presence of the stationary objects affects the distribution of analytes only. The chemical potentials in eq A.1 are linked via the Gibbs-Duhem equation away from the analyte under constant  $T$  and  $P$ .<sup>3,4</sup>

$$0 = \sum_{i=s,e_1,e_2} c_i d\mu_i \quad (\text{A.2})$$

Eliminating  $d\mu_s$  via eqs A.1 and A.2 yields

$$-d\mu_a^{(\alpha)*} = \sum_{i=e_1,e_2} c_i \left( G_{ai}^{(\alpha)} - G_{as}^{(\alpha)} \right) d\mu_i \quad (\text{A.3})$$

Differentiating eq (A.3) at the  $c_{e_1} \rightarrow 0$  limit in the presence of a dilute  $e_2$  yields

$$\begin{aligned} & - \left( \frac{\partial \mu_a^{(\alpha)*}}{\partial c_{e_1}} \right)_{T,P,c_{e_2};c_{e_1} \rightarrow 0} \\ &= c_{e_1} \left( G_{ae_1}^{(\alpha)} - G_{as}^{(\alpha)} \right) \left( \frac{\partial \mu_{e_1}}{\partial c_{e_1}} \right)_{T,P,c_{e_2};c_{e_1} \rightarrow 0} + c_{e_2} \left( G_{ae_2}^{(\alpha)} - G_{as}^{(\alpha)} \right) \left( \frac{\partial \mu_{e_2}}{\partial c_{e_1}} \right)_{T,P,c_{e_2};c_{e_1} \rightarrow 0} \\ &\simeq G_{ae_1}^{(\alpha)} - G_{as}^{(\alpha)} \quad (\text{A.4a}) \end{aligned}$$

For the final step of eq (A.4), we have used: (i) From Raoult's Law,  $\mu_{e_1} = \mu_{e_1}^\infty + RT \ln x_{e_1}$ , where  $\mu_{e_1}^\infty$  is the dilute ideal standard state and  $x_{e_1}$  is the mole fraction of  $e_1$ . Since  $x_{e_1} = \frac{c_{e_1}}{c_{e_1} + c_{e_2} + c_s + c_a} \simeq \frac{c_{e_1}}{c_s^0}$  with the bulk solvent concentration  $c_s^0$ , because  $e_1$ ,  $e_2$  and  $a$  are all dilute, and  $c_s^0$  is a constant when carrying out differentiation; (ii) From Raoult's Law,  $\mu_{e_2} = \mu_{e_2}^\infty + RT \ln x_{e_2}$ , where  $\mu_{e_2}^\infty$  is the dilute ideal standard state and  $x_{e_2}$  is the mole fraction of  $e_2$ . Since  $x_{e_2} = \frac{c_{e_2}}{c_{e_1} + c_{e_2} + c_s + c_a} \simeq \frac{c_{e_2}}{c_s^0}$ ,  $x_{e_2}$  is not affected by the introduction of dilute  $c_{e_1}$ , leading to  $\left( \frac{\partial \mu_{e_2}}{\partial c_{e_1}} \right)_{T,P,c_{e_2};c_{e_1} \rightarrow 0} \simeq 0$ . Likewise,

$$-\left(\frac{\partial \mu_a^{(\alpha)*}}{\partial c_{e_2}}\right)_{T,P,c_{e_1};c_{e_2} \rightarrow 0} \simeq G_{ae_2}^{(\alpha)} - G_{as}^{(\alpha)} \quad (\text{A.4b})$$

can also be derived.

Taking the difference between the mobile and stationary phases, eqs A.4a and A.4b can be rewritten as

$$-\left(\frac{\partial \Delta \mu_a^*}{\partial c_{e_1}}\right)_{T,P,c_{e_2};c_{e_1} \rightarrow 0} \simeq \Delta G_{ae_1} - \Delta G_{as} \quad (\text{A.5a})$$

$$-\left(\frac{\partial \Delta \mu_a^*}{\partial c_{e_2}}\right)_{T,P,c_{e_1};c_{e_2} \rightarrow 0} \simeq \Delta G_{ae_2} - \Delta G_{as} \quad (\text{A.5b})$$

where the KBI difference has been introduced via eq 5 (in the direction of stationary  $\rightarrow$  mobile). Using  $\Delta \mu_a^* = RT \ln K$  (noting how  $K$  is defined in eq 1 for the sign), in combination with eq 2 (noting that the  $c_{e_1}$  and  $c_{e_2}$  dependence of  $k$  comes from  $K$ ), we obtain from eqs A.5a and A.5b,

$$-\left(\frac{\partial \ln k}{\partial c_{e_1}}\right)_{T,P,c_{e_2};c_{e_1} \rightarrow 0} \simeq \Delta G_{ae_1} - \Delta G_{as} \quad (\text{A.6a})$$

$$-\left(\frac{\partial \ln k}{\partial c_{e_2}}\right)_{T,P,c_{e_1};c_{e_2} \rightarrow 0} \simeq \Delta G_{ae_2} - \Delta G_{as} \quad (\text{A.6b})$$

When there is only one solvent species, eq A.6 automatically reduces to eq 8 in the main text.

Now we show that the effects of eluents are additive at the dilute eluent limit. (Note that the additivity may break down when  $e_1$  and  $e_2$  are concentrated). It is customary in experimental practice to use a prepared mixture that contains the fixed fractions of  $e_1$  and  $e_2$ . In this context, increasing the “eluent” concentration  $c_e$  means

$$-\left(\frac{\partial \ln k}{\partial c_e}\right)_{T,P} = -\left(\frac{\partial \ln k}{\partial c_{e_1}}\right)_{T,P} \left(\frac{\partial c_{e_1}}{\partial c_e}\right)_{T,P} - \left(\frac{\partial \ln k}{\partial c_{e_2}}\right)_{T,P} \left(\frac{\partial c_{e_2}}{\partial c_e}\right)_{T,P} \quad (\text{A.7})$$

In the dilute region,  $\left(\frac{\partial c_e}{\partial c_{e_1}}\right)_{T,P} = \left(\frac{\partial c_{e_1}}{\partial c_{e_1}}\right)_{T,P} + \left(\frac{\partial c_{e_2}}{\partial c_{e_1}}\right)_{T,P} = 1$  because the presence of  $e_1$  does not affect  $c_{e_2}$ . Likewise,  $\left(\frac{\partial c_e}{\partial c_{e_2}}\right)_{T,P} = 1$ . Consequently, we arrive at

$$-\left(\frac{\partial \ln k}{\partial c_e}\right)_{T,P} = -\left(\frac{\partial \ln k}{\partial c_{e_1}}\right)_{T,P} - \left(\frac{\partial \ln k}{\partial c_{e_2}}\right)_{T,P} \quad (\text{A.8})$$

Which means that the eluent gradients are additive at dilution.

## Appendix A References

- 1 S. Shimizu, S. Abbott, K. Adamska and A. Voelkel. *Analyst*, 2019, 144, 1632–1641.
- 2 A. Ben-Naim. *J. Chem. Phys.*, 1977, 67, 4884–4890.
- 3 S. Shimizu and N. Matubayas. *Phys. Chem. Chem. Phys.*, 2017, 19, 23597–23605.
- 4 S. Shimizu. *Proc. Natl. Acad. Sci.*, 2004, 101, 1195–1199.
